# Supplementary material
Source: HighWire-hosted journal article supplement (https://www.qdcxjkg.com/highwire/filestream/112587/field_highwire_adjunct_files/0/CME_33-2_question_2.pdf)

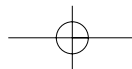

# CME Exam and Evaluation

## (1 CME credit)

To receive CME credits, read the CME article in this issue, indicate the correct responses and complete the requested information below. The form is also available in electronic format at [www.erj.ersjournals.com/current.shtml](http://www.erj.ersjournals.com/current.shtml). To return the form, you can either:

- use this form and return it completed to ERSJ Ltd, 442 Glossop Road, Sheffield, S10 2PX, UK.
- save the electronic form as a Word document and send it by e-mail to [info@ersj.org.uk](mailto:info@ersj.org.uk)

Certificates will be emailed to the address filled in below. Please allow 4 weeks for processing.

### 1. Applicant personal details.

ERS Membership No. (if known): ..... Date of Birth (DD/MM/YYYY): .....

Family Name: ..... First Name: .....

Mailing Address: .....

Postal Code: ..... City: ..... Country: .....

Telephone: + ..... Fax: + .....

E-mail: .....

### 2. Educational questions. Answer by marking the correct answer.

**Article by V. Regueiro *et al.* titled "Lipopolysaccharide-binding protein and CD14 are increased in the bronchoalveolar lavage fluid of smokers"**

#### 1. Which of the following statements is true?

- Lipopolysaccharide-binding protein (LBP) and sCD14 are acute-phase proteins.
- LBP does not aid in pathogen recognition.
- CD14 is always present in a soluble form.
- The level of LBP in serum is below the ng range.

#### 2. The so-called "British hypothesis" states that:

- Infections do not play a significant role in airway obstruction.
- Infections and smoking play a role in progressive airway obstruction.
- The hypothesis is not relevant for airway diseases.
- Only smoking plays a role in progressive airway obstruction.

#### 3. Which of the following statements is false?

- LBP and sCD14 may act as inhibitors of bacteria-induced inflammation.
- Smoking increases the protein levels of LBP and sCD14 in bronchoalveolar fluid.
- There is a correlation between severity of COPD and levels of LBP.
- LBP and sCD14 affect signalling pathways, leading to inflammation.

#### 4. Nontypeable *Haemophilus influenzae*:

- Induces interleukin-8 *via* activation of nuclear factor- $\kappa$ B and mitogen-activated protein kinase p38.
- Is not internalised by airway epithelial cells.
- Is not an important human pathogen.

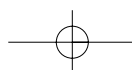

Supplement: CME_33-2_question_2.pdf [file CME_33-2_question_2.pdf]
